# Supplementary material
Source: publisher site journal article supplement (https://www.dovepress.com/article/544333)
Supplement: Supplementary file 1 [file Supplementary%20Material%201%20Standardized%20telephone%20follow-up%20script_1.docx]

**Supplementary Material 1** Standardized telephone follow-up script

| Section | Standardized wording / content | Notes |
| --- | --- | --- |
| 1. Introduction and consent | “Hello, this is [Name], a physician/researcher from the Allergy Center, Department of Otorhinolaryngology–Head and Neck Surgery, Shenzhen University General Hospital. We are conducting a follow-up regarding your subcutaneous immunotherapy (SCIT). This will only take a few minutes. May I confirm your willingness to participate in this follow-up?” | For pediatric patients, address the primary caregiver. Proceed only if verbal consent is obtained. |
| 2. Treatment status | “Are you currently continuing SCIT?” Options: (a) Continuing as scheduled; (b) Delayed/temporarily suspended; (c) Discontinued; (d) Transferred to another hospital. | Record patient’s status clearly. |
| 3. Reasons for discontinuation (if discontinued) | “Could you please tell us the main reason you discontinued SCIT?” Predefined categories (select one or more): (a) Relocation (school, work, international travel); (b) Unsatisfactory treatment efficacy; (c) Lack of time; (d) Pregnancy or gynecological conditions; (e) Significant improvement but transportation inconvenience; (f) Academic or work pressure; (g) COVID-19 pandemic; (h) Failure to initiate after medication dispensed; (i) Other (please specify). | Open-ended responses should be recorded verbatim if not fitting predefined categories. |
| 4. Adverse events | “Did you experience any local or systemic adverse reactions during SCIT? If yes, what type, and did this influence your decision to stop treatment?” | Record adverse events and their impact. |
| 5. Patient perceptions | (a) “On a scale of 0 to 10, how effective do you think SCIT was for your symptoms?” (b) “Were you satisfied with SCIT overall?” (Yes/No/Neutral) (c) “Did you feel that SCIT imposed a financial or logistical burden on you?” (Yes/No; please specify) (d) “Do you have any suggestions for improving SCIT or patient support?” | Use structured scales when possible; record free comments when relevant. |
| 6. Closing | “Thank you very much for your time and valuable feedback. Your responses will help us improve patient care. We may contact you in the future if further clarification is needed. Have a good day.” | Express appreciation and confirm preferred future contact method. |
